# Supplementary material
Source: PubMed Central journal article supplement (PMC4280157)
Supplement: tableS1.pdf [file tableS1.pdf]

## SUPPLEMENTAL DATA FOR

### **The Genome-wide Transcriptional Response to Neonatal Hyperoxia Identifies Ahr as a Key Regulator.**

Soumyaroop Bhattacharya<sup>1,2</sup>, Zhongyang Zhou<sup>1</sup>, Min Yee<sup>1,3</sup>, Chin-Yi Chu<sup>1,2</sup>, Ashley M Lopez<sup>1,2</sup>, Valerie A Lunger<sup>1,2</sup>, Siva Kumar Solleti<sup>1,2</sup>, Emily Resseguie<sup>1,3</sup>, Bradley Buczynski<sup>1,3</sup>, Thomas J Mariani<sup>1,2</sup>, Michael A O'Reilly<sup>1,3</sup>

<sup>1</sup>Division of Neonatology, <sup>2</sup>Pediatric Molecular and Personalized Medicine Program and <sup>3</sup>Perinatal and Pediatric Origins of Disease Program, Department of Pediatrics, University of Rochester Medical Center, Rochester NY

7 Figures

0 Tables

1 Supplemental Table

Address for Correspondence:

Thomas J Mariani, PhD  
Division of Neonatology,  
Department of Pediatrics,  
University of Rochester Medical Center,  
601 Elmwood Ave, Box 850,  
Rochester, NY 14642,  
USA

Running Title: RNA-Seq in Neonatal Hyperoxia

Keywords: RNA-Seq, BPD, AHR

Funding support:

Supplemental Table 1: Genes identified by SAM as differentially expressed (at median FDR =0) in both RPM and TM normalized data and also had a magnitude of change greater than two-fold.

| <b>Symbol</b> | <b>Entrez Gene Name</b>                                                                  | <b>p-value</b> | <b>Fold Change</b> |
|---------------|------------------------------------------------------------------------------------------|----------------|--------------------|
| GDF15         | growth differentiation factor 15                                                         | 2.95E-05       | 56.26              |
| SLC6A3        | solute carrier family 6 (neurotransmitter transporter, dopamine), member 3               | 3.99E-06       | 23.74              |
| EDA2R         | ectodysplasin A2 receptor                                                                | 1.45E-05       | 23.44              |
| CDKN1A        | cyclin-dependent kinase inhibitor 1A (p21, Cip1)                                         | 5.88E-06       | 19.79              |
| PSRC1         | proline/serine-rich coiled-coil 1                                                        | 5.47E-06       | 12.24              |
| CCL3          | chemokine (C-C motif) ligand 3                                                           | 5.48E-06       | 10.30              |
| PTPRN         | protein tyrosine phosphatase, receptor type, N                                           | 1.36E-05       | 10.01              |
| TREM2         | triggering receptor expressed on myeloid cells 2                                         | 2.37E-05       | 7.36               |
| APLN          | apelin                                                                                   | 7.77E-05       | 7.05               |
| MGMT          | O-6-methylguanine-DNA methyltransferase                                                  | 6.02E-06       | 6.80               |
| LILRB4        | leukocyte immunoglobulin-like receptor, subfamily B (with TM and ITIM domains), member 4 | 1.05E-05       | 6.59               |
| CCNG1         | cyclin G1                                                                                | 5.09E-05       | 6.08               |
| MNDA          | myeloid cell nuclear differentiation antigen                                             | 8.21E-05       | 5.92               |
| MSR1          | macrophage scavenger receptor 1                                                          | 7.51E-06       | 5.89               |
| COL5A3        | collagen, type V, alpha 3                                                                | 4.62E-06       | 5.74               |
| SLC19A2       | solute carrier family 19 (thiamine transporter), member 2                                | 1.90E-06       | 5.74               |
| NRG1          | neuregulin 1                                                                             | 4.56E-05       | 5.70               |
| ATF3          | activating transcription factor 3                                                        | 2.52E-05       | 5.30               |
| GFPT2         | glutamine-fructose-6-phosphate transaminase 2                                            | 1.77E-05       | 5.11               |
| SULF2         | sulfatase 2                                                                              | 1.81E-05       | 4.93               |
| CD80          | CD80 molecule                                                                            | 2.73E-05       | 4.75               |
| MX2           | myxovirus (influenza virus) resistance 2 (mouse)                                         | 3.47E-05       | 4.75               |
| STEAP4        | STEAP family member 4                                                                    | 5.25E-05       | 4.59               |
| PLCD4         | phospholipase C, delta 4                                                                 | 8.83E-05       | 4.57               |
| MARCO         | macrophage receptor with collagenous structure                                           | 3.92E-05       | 4.50               |
| MS4A7         | membrane-spanning 4-domains, subfamily A, member 7                                       | 2.04E-05       | 4.35               |
| ZMAT3         | zinc finger, matrin-type 3                                                               | 1.34E-07       | 4.28               |
| TPSAB1/TPSB2  | tryptase alpha/beta 1                                                                    | 4.54E-06       | 4.19               |
| TMEM54        | transmembrane protein 54                                                                 | 6.70E-05       | 4.17               |
| CMA1          | chymase 1, mast cell                                                                     | 8.58E-05       | 4.11               |
| ZFYVE28       | zinc finger, FYVE domain containing 28                                                   | 8.49E-06       | 4.10               |
| LOXL4         | lysyl oxidase-like 4                                                                     | 4.62E-05       | 3.99               |
| CD68          | CD68 molecule                                                                            | 1.10E-05       | 3.79               |
| GCLC          | glutamate-cysteine ligase, catalytic subunit                                             | 7.45E-05       | 3.42               |
| IGF2BP1       | insulin-like growth factor 2 mRNA binding protein 1                                      | 1.44E-05       | 3.38               |
| BAX           | BCL2-associated X protein                                                                | 1.34E-08       | 3.32               |

|         |                                                                                     |          |      |
|---------|-------------------------------------------------------------------------------------|----------|------|
| BHLHE40 | basic helix-loop-helix family, member e40                                           | 2.64E-06 | 3.28 |
| PHLDA3  | pleckstrin homology-like domain, family A, member 3                                 | 1.07E-05 | 3.23 |
| SLC37A2 | solute carrier family 37 (glycerol-3-phosphate transporter), member 2               | 2.57E-05 | 3.21 |
| DUSP4   | dual specificity phosphatase 4                                                      | 1.60E-07 | 3.18 |
| SCN1B   | sodium channel, voltage-gated, type I, beta                                         | 1.77E-05 | 3.12 |
| PDGFC   | platelet derived growth factor C                                                    | 1.76E-05 | 3.07 |
| TNFAIP2 | tumor necrosis factor, alpha-induced protein 2                                      | 2.16E-06 | 3.05 |
| AK1     | adenylate kinase 1                                                                  | 3.17E-06 | 3.02 |
| TINAG   | tubulointerstitial nephritis antigen                                                | 6.11E-06 | 3.01 |
| TTC9    | tetratricopeptide repeat domain 9                                                   | 5.05E-05 | 3.01 |
| DCTD    | dCMP deaminase                                                                      | 1.65E-05 | 3.00 |
| FXYD5   | FXYD domain containing ion transport regulator 5                                    | 8.40E-08 | 2.99 |
| CFB     | complement factor B                                                                 | 3.30E-05 | 2.98 |
| HS6ST2  | heparan sulfate 6-O-sulfotransferase 2                                              | 1.47E-05 | 2.95 |
| HP      | haptoglobin                                                                         | 8.24E-05 | 2.94 |
| CASP4   | caspase 4, apoptosis-related cysteine peptidase                                     | 3.66E-05 | 2.90 |
| CCR1    | chemokine (C-C motif) receptor 1                                                    | 1.41E-06 | 2.90 |
| COX6B2  | cytochrome c oxidase subunit VIb polypeptide 2 (testis)                             | 1.07E-05 | 2.89 |
| PQLC3   | PQ loop repeat containing 3                                                         | 1.34E-07 | 2.88 |
| SESN2   | sestrin 2                                                                           | 4.44E-06 | 2.86 |
| PLAUR   | plasminogen activator, urokinase receptor                                           | 3.48E-05 | 2.82 |
| SLC11A1 | solute carrier family 11 (proton-coupled divalent metal ion transporters), member 1 | 1.74E-05 | 2.79 |
| EPHX1   | epoxide hydrolase 1, microsomal (xenobiotic)                                        | 2.31E-06 | 2.79 |
| ASS1    | argininosuccinate synthase 1                                                        | 8.84E-05 | 2.71 |
| MAT1A   | methionine adenosyltransferase I, alpha                                             | 4.09E-05 | 2.70 |
| C1QB    | complement component 1, q subcomponent, B chain                                     | 4.58E-06 | 2.69 |
| ASNS    | asparagine synthetase (glutamine-hydrolyzing)                                       | 1.18E-06 | 2.68 |
| BST1    | bone marrow stromal cell antigen 1                                                  | 2.72E-05 | 2.67 |
| CTSH    | cathepsin H                                                                         | 2.32E-05 | 2.65 |
| MDM2    | Mdm2 p53 binding protein homolog (mouse)                                            | 1.52E-05 | 2.64 |
| SCNN1B  | sodium channel, nonvoltage-gated 1, beta                                            | 5.02E-05 | 2.64 |
| HSPB8   | heat shock 22kDa protein 8                                                          | 5.65E-05 | 2.60 |
| HSPA9   | heat shock 70kDa protein 9 (mortalin)                                               | 7.00E-06 | 2.59 |
| PLK3    | polo-like kinase 3                                                                  | 1.15E-05 | 2.58 |
| RPS27L  | ribosomal protein S27-like                                                          | 4.11E-05 | 2.58 |
| TBC1D2  | TBC1 domain family, member 2                                                        | 4.16E-06 | 2.57 |
| SORBS2  | sorbin and SH3 domain containing 2                                                  | 3.17E-05 | 2.54 |
| ICAM1   | intercellular adhesion molecule 1                                                   | 6.13E-05 | 2.53 |
| CSTB    | cystatin B (stefin B)                                                               | 1.58E-05 | 2.52 |
| SLC16A7 | solute carrier family 16, member 7 (monocarboxylic acid transporter 2)              | 9.94E-05 | 2.52 |
| MIF     | macrophage migration inhibitory factor (glycosylation-                              | 6.44E-05 | 2.52 |

|          |                                                                                            |          |      |
|----------|--------------------------------------------------------------------------------------------|----------|------|
|          | inhibiting factor)                                                                         |          |      |
| ADHFE1   | alcohol dehydrogenase, iron containing, 1                                                  | 3.94E-05 | 2.51 |
| RENBP    | renin binding protein                                                                      | 2.19E-05 | 2.50 |
| A2LD1    | AIG2-like domain 1                                                                         | 6.30E-05 | 2.47 |
| COL18A1  | collagen, type XVIII, alpha 1                                                              | 7.27E-05 | 2.45 |
| LPAR2    | lysophosphatidic acid receptor 2                                                           | 1.08E-05 | 2.44 |
| ADSSL1   | adenylosuccinate synthase like 1                                                           | 1.39E-05 | 2.44 |
| CPT1C    | carnitine palmitoyltransferase 1C                                                          | 4.20E-07 | 2.43 |
| CCND1    | cyclin D1                                                                                  | 6.65E-05 | 2.43 |
| GLIPR1   | GLI pathogenesis-related 1                                                                 | 1.51E-06 | 2.40 |
| IGF2BP3  | insulin-like growth factor 2 mRNA binding protein 3                                        | 4.99E-06 | 2.39 |
| A4GALT   | alpha 1,4-galactosyltransferase                                                            | 4.18E-05 | 2.39 |
| TBXAS1   | thromboxane A synthase 1 (platelet)                                                        | 2.15E-05 | 2.38 |
| CREG1    | cellular repressor of E1A-stimulated genes 1                                               | 2.79E-06 | 2.38 |
| AIF1     | allograft inflammatory factor 1                                                            | 7.27E-05 | 2.35 |
| KIF1A    | kinesin family member 1A                                                                   | 1.10E-05 | 2.34 |
| EPHA2    | EPH receptor A2                                                                            | 3.36E-06 | 2.34 |
| GRIA3    | glutamate receptor, ionotropic, AMPA 3                                                     | 7.23E-05 | 2.33 |
| NCEH1    | neutral cholesterol ester hydrolase 1                                                      | 9.61E-07 | 2.33 |
| CRLF1    | cytokine receptor-like factor 1                                                            | 4.41E-05 | 2.32 |
| LITAF    | lipopolysaccharide-induced TNF factor                                                      | 4.89E-06 | 2.32 |
| MAFF     | v-maf musculoaponeurotic fibrosarcoma oncogene homolog F (avian)                           | 3.47E-06 | 2.31 |
| PMAIP1   | phorbol-12-myristate-13-acetate-induced protein 1                                          | 6.04E-05 | 2.31 |
| LGALS3BP | lectin, galactoside-binding, soluble, 3 binding protein                                    | 7.15E-06 | 2.30 |
| CDC34    | cell division cycle 34 homolog ( <i>S. cerevisiae</i> )                                    | 6.97E-05 | 2.30 |
| FUCA2    | fucosidase, alpha-L- 2, plasma                                                             | 8.24E-07 | 2.25 |
| SFXN1    | sideroflexin 1                                                                             | 3.65E-05 | 2.25 |
| ANO1     | anoctamin 1, calcium activated chloride channel                                            | 1.28E-05 | 2.24 |
| TLR7     | toll-like receptor 7                                                                       | 6.74E-05 | 2.24 |
| FTH1     | ferritin, heavy polypeptide 1                                                              | 1.63E-05 | 2.24 |
| INF2     | inverted formin, FH2 and WH2 domain containing                                             | 6.20E-06 | 2.23 |
| SAT1     | spermidine/spermine N1-acetyltransferase 1                                                 | 8.77E-06 | 2.20 |
| CD55     | CD55 molecule, decay accelerating factor for complement (Cromer blood group)               | 8.94E-06 | 2.19 |
| CTSD     | cathepsin D                                                                                | 2.52E-05 | 2.18 |
| TMEM43   | transmembrane protein 43                                                                   | 3.31E-05 | 2.16 |
| EMR1     | egf-like module containing, mucin-like, hormone receptor-like 1                            | 5.18E-07 | 2.16 |
| AOX1     | aldehyde oxidase 1                                                                         | 2.62E-05 | 2.15 |
| SLC3A2   | solute carrier family 3 (activators of dibasic and neutral amino acid transport), member 2 | 5.31E-06 | 2.15 |
| EYA2     | eyes absent homolog 2 ( <i>Drosophila</i> )                                                | 2.25E-06 | 2.14 |
| APRT     | adenine phosphoribosyltransferase                                                          | 1.22E-06 | 2.14 |

|          |                                                                                                   |          |      |
|----------|---------------------------------------------------------------------------------------------------|----------|------|
| CHCHD10  | coiled-coil-helix-coiled-coil-helix domain containing 10                                          | 8.74E-07 | 2.13 |
| IGF2BP2  | insulin-like growth factor 2 mRNA binding protein 2                                               | 2.09E-06 | 2.12 |
| ECM1     | extracellular matrix protein 1                                                                    | 6.70E-06 | 2.11 |
| TBC1D9   | TBC1 domain family, member 9 (with GRAM domain)                                                   | 1.25E-05 | 2.11 |
| LIPH     | lipase, member H                                                                                  | 2.01E-06 | 2.11 |
| HTATIP2  | HIV-1 Tat interactive protein 2, 30kDa                                                            | 6.65E-06 | 2.10 |
| CTSB     | cathepsin B                                                                                       | 2.38E-06 | 2.07 |
| PTGS1    | prostaglandin-endoperoxide synthase 1 (prostaglandin G/H synthase and cyclooxygenase)             | 1.06E-05 | 2.07 |
| SNX10    | sorting nexin 10                                                                                  | 1.16E-05 | 2.07 |
| BEND7    | BEN domain containing 7                                                                           | 1.63E-05 | 2.05 |
| LAMB3    | laminin, beta 3                                                                                   | 2.25E-06 | 2.05 |
| CDH3     | cadherin 3, type 1, P-cadherin (placental)                                                        | 1.01E-05 | 2.05 |
| TYROBP   | TYRO protein tyrosine kinase binding protein                                                      | 1.12E-05 | 2.04 |
| MMRN2    | multimerin 2                                                                                      | 8.78E-05 | 2.03 |
| MYBL1    | v-myb myeloblastosis viral oncogene homolog (avian)-like 1                                        | 1.11E-04 | 2.03 |
| LDHB     | lactate dehydrogenase B                                                                           | 1.33E-05 | 2.02 |
| TTYH3    | tweety homolog 3 (Drosophila)                                                                     | 3.33E-05 | 0.50 |
| GPR64    | G protein-coupled receptor 64                                                                     | 5.55E-05 | 0.50 |
| ATP1A2   | ATPase, Na <sup>+</sup> /K <sup>+</sup> transporting, alpha 2 polypeptide                         | 5.71E-05 | 0.50 |
| ETV1     | ets variant 1                                                                                     | 2.32E-05 | 0.50 |
| ZC3HAV1L | zinc finger CCCH-type, antiviral 1-like                                                           | 1.21E-05 | 0.50 |
| SH3PXD2A | SH3 and PX domains 2A                                                                             | 5.92E-05 | 0.49 |
| EPHB4    | EPH receptor B4                                                                                   | 1.05E-05 | 0.49 |
| SMARCA2  | SWI/SNF related, matrix associated, actin dependent regulator of chromatin, subfamily a, member 2 | 5.64E-05 | 0.49 |
| SCUBE1   | signal peptide, CUB domain, EGF-like 1                                                            | 3.16E-05 | 0.49 |
| HOXB5    | homeobox B5                                                                                       | 8.39E-06 | 0.48 |
| RASGRP1  | RAS guanyl releasing protein 1 (calcium and DAG-regulated)                                        | 2.97E-05 | 0.48 |
| EGFLAM   | EGF-like, fibronectin type III and laminin G domains                                              | 3.55E-05 | 0.48 |
| PDLIM3   | PDZ and LIM domain 3                                                                              | 2.48E-05 | 0.48 |
| HIGD1B   | HIG1 hypoxia inducible domain family, member 1B                                                   | 2.21E-06 | 0.48 |
| SHANK3   | SH3 and multiple ankyrin repeat domains 3                                                         | 1.13E-05 | 0.48 |
| ANKRD44  | ankyrin repeat domain 44                                                                          | 3.60E-05 | 0.48 |
| DCHS1    | dachsous 1 (Drosophila)                                                                           | 1.27E-05 | 0.48 |
| PRICKLE2 | prickle homolog 2 (Drosophila)                                                                    | 2.94E-06 | 0.47 |
| JAM2     | junctional adhesion molecule 2                                                                    | 1.08E-05 | 0.47 |
| NOSTRIN  | nitric oxide synthase trafficker                                                                  | 3.59E-05 | 0.47 |
| GUCY1B3  | guanylate cyclase 1, soluble, beta 3                                                              | 6.79E-07 | 0.47 |
| CBFA2T3  | core-binding factor, runt domain, alpha subunit 2; translocated to, 3                             | 3.27E-05 | 0.47 |
| PDGFRB   | platelet-derived growth factor receptor, beta polypeptide                                         | 1.65E-05 | 0.47 |
| ST8SIA4  | ST8 alpha-N-acetyl-neuraminide alpha-2,8-sialyltransferase 4                                      | 7.18E-07 | 0.47 |
| ERG      | v-ets erythroblastosis virus E26 oncogene homolog (avian)                                         | 1.75E-05 | 0.47 |

|         |                                                                                        |          |      |
|---------|----------------------------------------------------------------------------------------|----------|------|
| STK4    | serine/threonine kinase 4                                                              | 9.33E-06 | 0.47 |
| SRPX    | sushi-repeat containing protein, X-linked                                              | 1.87E-07 | 0.47 |
| AHR     | aryl hydrocarbon receptor                                                              | 1.65E-05 | 0.47 |
| CLEC1A  | C-type lectin domain family 1, member A                                                | 5.60E-05 | 0.46 |
| SNN     | stannin                                                                                | 1.42E-05 | 0.46 |
| HOXA3   | homeobox A3                                                                            | 4.21E-05 | 0.46 |
| ADAMTS7 | ADAM metallopeptidase with thrombospondin type 1 motif, 7                              | 3.50E-05 | 0.46 |
| APC2    | adenomatosis polyposis coli 2                                                          | 5.72E-05 | 0.46 |
| LIFR    | leukemia inhibitory factor receptor alpha                                              | 2.08E-06 | 0.46 |
| SEMA3C  | sema domain, immunoglobulin domain (Ig), short basic domain, secreted, (semaphorin) 3C | 2.39E-05 | 0.46 |
| PDE7B   | phosphodiesterase 7B                                                                   | 2.18E-05 | 0.46 |
| HMCN1   | hemicentin 1                                                                           | 8.26E-05 | 0.46 |
| ARRB1   | arrestin, beta 1                                                                       | 1.33E-05 | 0.46 |
| ARL15   | ADP-ribosylation factor-like 15                                                        | 3.27E-05 | 0.46 |
| TMEFF1  | transmembrane protein with EGF-like and two follistatin-like domains 1                 | 2.07E-05 | 0.46 |
| MAP4K2  | mitogen-activated protein kinase kinase kinase kinase 2                                | 3.51E-05 | 0.46 |
| PRCP    | prolylcarboxypeptidase (angiotensinase C)                                              | 2.18E-05 | 0.46 |
| GPR126  | G protein-coupled receptor 126                                                         | 3.95E-06 | 0.46 |
| RGS9    | regulator of G-protein signaling 9                                                     | 3.07E-06 | 0.46 |
| ANGPTL2 | angiopoietin-like 2                                                                    | 5.50E-05 | 0.46 |
| FAM13C  | family with sequence similarity 13, member C                                           | 5.85E-06 | 0.45 |
| THBS2   | thrombospondin 2                                                                       | 4.20E-05 | 0.45 |
| PCDH18  | protocadherin 18                                                                       | 4.71E-05 | 0.45 |
| SLC36A2 | solute carrier family 36 (proton/amino acid symporter), member 2                       | 4.79E-05 | 0.45 |
| SLC38A5 | solute carrier family 38, member 5                                                     | 4.73E-05 | 0.45 |
| ADAMTS8 | ADAM metallopeptidase with thrombospondin type 1 motif, 8                              | 1.59E-05 | 0.45 |
| AMOT    | angiomin                                                                               | 2.60E-05 | 0.45 |
| CHST2   | carbohydrate (N-acetylglucosamine-6-O) sulfotransferase 2                              | 4.49E-05 | 0.45 |
| NR2F1   | nuclear receptor subfamily 2, group F, member 1                                        | 1.58E-05 | 0.45 |
| ANTXR2  | anthrax toxin receptor 2                                                               | 7.47E-07 | 0.44 |
| ETS1    | v-ets erythroblastosis virus E26 oncogene homolog 1 (avian)                            | 3.20E-05 | 0.44 |
| FANCC   | Fanconi anemia, complementation group C                                                | 3.41E-05 | 0.44 |
| RECK    | reversion-inducing-cysteine-rich protein with kazal motifs                             | 4.26E-05 | 0.44 |
| SPECC1L | sperm antigen with calponin homology and coiled-coil domains 1-like                    | 5.40E-05 | 0.44 |
| ATP1B2  | ATPase, Na <sup>+</sup> /K <sup>+</sup> transporting, beta 2 polypeptide               | 3.47E-05 | 0.44 |
| SOX13   | SRY (sex determining region Y)-box 13                                                  | 1.21E-05 | 0.43 |
| USHBP1  | Usher syndrome 1C binding protein 1                                                    | 6.34E-05 | 0.43 |
| VWF     | von Willebrand factor                                                                  | 7.96E-05 | 0.43 |
| THSD1   | thrombospondin, type I, domain containing 1                                            | 3.26E-05 | 0.42 |
| GALNTL1 | UDP-N-acetyl-alpha-D-galactosamine:polypeptide N-                                      | 5.10E-06 | 0.42 |

|           |                                                                                        |          |      |
|-----------|----------------------------------------------------------------------------------------|----------|------|
|           | acetylgalactosaminyltransferase-like 1                                                 |          |      |
| LTBP2     | latent transforming growth factor beta binding protein 2                               | 6.11E-05 | 0.42 |
| PRRT2     | proline-rich transmembrane protein 2                                                   | 5.47E-05 | 0.42 |
| HOXA5     | homeobox A5                                                                            | 2.42E-05 | 0.42 |
| ADAMTS5   | ADAM metalloproteinase with thrombospondin type 1 motif, 5                             | 2.34E-05 | 0.41 |
| ELN       | elastin                                                                                | 3.93E-05 | 0.40 |
| CD248     | CD248 molecule, endosialin                                                             | 2.86E-05 | 0.40 |
| SPON2     | spondin 2, extracellular matrix protein                                                | 1.99E-05 | 0.40 |
| C1QTNF7   | C1q and tumor necrosis factor related protein 7                                        | 9.83E-06 | 0.40 |
| TRIM36    | tripartite motif containing 36                                                         | 4.91E-05 | 0.40 |
| PTPRB     | protein tyrosine phosphatase, receptor type, B                                         | 3.28E-05 | 0.39 |
| NTN3      | netrin 3                                                                               | 5.79E-05 | 0.39 |
| NCALD     | neurocalcin delta                                                                      | 3.46E-05 | 0.39 |
| MCF2L     | MCF.2 cell line derived transforming sequence-like                                     | 1.03E-05 | 0.38 |
| ARHGAP20  | Rho GTPase activating protein 20                                                       | 6.53E-06 | 0.38 |
| NPNT      | nephronectin                                                                           | 8.97E-06 | 0.38 |
| CDKN2C    | cyclin-dependent kinase inhibitor 2C (p18, inhibits CDK4)                              | 2.07E-06 | 0.38 |
| FAM129A   | family with sequence similarity 129, member A                                          | 3.96E-05 | 0.38 |
| IL17RD    | interleukin 17 receptor D                                                              | 9.69E-06 | 0.38 |
| ACE       | angiotensin I converting enzyme (peptidyl-dipeptidase A) 1                             | 3.52E-05 | 0.38 |
| EMID1     | EMI domain containing 1                                                                | 3.78E-05 | 0.38 |
| PCSK5     | proprotein convertase subtilisin/kexin type 5                                          | 1.34E-05 | 0.38 |
| LDB2      | LIM domain binding 2                                                                   | 5.65E-06 | 0.37 |
| LEPR      | leptin receptor                                                                        | 3.78E-05 | 0.37 |
| ASTN2     | astrotactin 2                                                                          | 8.62E-06 | 0.37 |
| CD2       | CD2 molecule                                                                           | 1.49E-05 | 0.37 |
| CLEC2D    | C-type lectin domain family 2, member D                                                | 2.12E-05 | 0.37 |
| GUCY1A3   | guanylate cyclase 1, soluble, alpha 3                                                  | 3.64E-06 | 0.37 |
| NUP210    | nucleoporin 210kDa                                                                     | 6.87E-05 | 0.37 |
| THBD      | thrombomodulin                                                                         | 2.77E-06 | 0.37 |
| SEMA3G    | sema domain, immunoglobulin domain (Ig), short basic domain, secreted, (semaphorin) 3G | 2.41E-05 | 0.36 |
| PODXL2    | podocalyxin-like 2                                                                     | 6.75E-05 | 0.36 |
| ABI3BP    | ABI family, member 3 (NESH) binding protein                                            | 8.34E-05 | 0.36 |
| PCOLCE2   |                                                                                        |          |      |
| (includes |                                                                                        |          |      |
| EG:26577) | procollagen C-endopeptidase enhancer 2                                                 | 5.63E-05 | 0.36 |
| RNF144A   | ring finger protein 144A                                                               | 1.73E-05 | 0.36 |
| CCDC85A   | coiled-coil domain containing 85A                                                      | 6.60E-05 | 0.36 |
| KCNK3     | potassium channel, subfamily K, member 3                                               | 2.38E-05 | 0.36 |
| PDE5A     | phosphodiesterase 5A, cGMP-specific                                                    | 4.65E-06 | 0.36 |
| RGS3      | regulator of G-protein signaling 3                                                     | 2.45E-05 | 0.36 |
| NTN1      | netrin 1                                                                               | 7.30E-05 | 0.35 |

|         |                                                                                  |          |      |
|---------|----------------------------------------------------------------------------------|----------|------|
| TMEM100 | transmembrane protein 100                                                        | 2.57E-05 | 0.34 |
| MFAP2   | microfibrillar-associated protein 2                                              | 4.18E-06 | 0.34 |
| PDGFRA  | platelet-derived growth factor receptor, alpha polypeptide                       | 2.19E-05 | 0.34 |
| TUBB4   | tubulin, beta 4                                                                  | 1.54E-05 | 0.34 |
| MAPT    | microtubule-associated protein tau                                               | 8.80E-06 | 0.33 |
| COX4I2  | cytochrome c oxidase subunit IV isoform 2 (lung)                                 | 2.66E-05 | 0.33 |
| PLCB1   | phospholipase C, beta 1 (phosphoinositide-specific)                              | 9.81E-06 | 0.33 |
| SOX17   | SRY (sex determining region Y)-box 17                                            | 1.18E-05 | 0.33 |
| GPIHBP1 | glycosylphosphatidylinositol anchored high density lipoprotein binding protein 1 | 4.72E-05 | 0.33 |
| HS3ST1  | heparan sulfate (glucosamine) 3-O-sulfotransferase 1                             | 3.81E-05 | 0.33 |
| SGCG    | sarcoglycan, gamma (35kDa dystrophin-associated glycoprotein)                    | 1.48E-05 | 0.33 |
| P2RY14  | purinergic receptor P2Y, G-protein coupled, 14                                   | 3.64E-07 | 0.33 |
| CLSTN2  | calysntenin 2                                                                    | 2.50E-06 | 0.32 |
| COL24A1 | collagen, type XXIV, alpha 1                                                     | 8.79E-06 | 0.32 |
| TMEM2   | transmembrane protein 2                                                          | 2.77E-07 | 0.32 |
| ENPEP   | glutamyl aminopeptidase (aminopeptidase A)                                       | 8.21E-06 | 0.32 |
| ASPN    | asporin                                                                          | 5.05E-05 | 0.31 |
| PALMD   | palmdelphin                                                                      | 6.39E-07 | 0.31 |
| TEK     | TEK tyrosine kinase, endothelial                                                 | 1.03E-05 | 0.31 |
| CAMK4   | calcium/calmodulin-dependent protein kinase IV                                   | 5.33E-05 | 0.30 |
| PRSS35  | protease, serine, 35                                                             | 7.59E-06 | 0.30 |
| TNFSF10 | tumor necrosis factor (ligand) superfamily, member 10                            | 1.54E-06 | 0.30 |
| SOX11   | SRY (sex determining region Y)-box 11                                            | 1.41E-05 | 0.30 |
| KIF26A  | kinesin family member 26A                                                        | 1.26E-05 | 0.30 |
| NTRK3   | neurotrophic tyrosine kinase, receptor, type 3                                   | 9.62E-06 | 0.29 |
| ADAM33  | ADAM metallopeptidase domain 33                                                  | 6.49E-05 | 0.29 |
| SEMA6A  | sema domain, transmembrane domain (TM), and cytoplasmic domain, (semaphorin) 6A  | 8.87E-06 | 0.29 |
| KCNQ4   | potassium voltage-gated channel, KQT-like subfamily, member 4                    | 5.88E-05 | 0.29 |
| PGM5    | phosphoglucomutase 5                                                             | 1.29E-05 | 0.29 |
| GCOM1   | GRINL1A complex locus                                                            | 5.62E-05 | 0.29 |
| PDZD2   | PDZ domain containing 2                                                          | 1.11E-05 | 0.27 |
| CHST8   | carbohydrate (N-acetylgalactosamine 4-O) sulfotransferase 8                      | 2.38E-05 | 0.27 |
| SCN7A   | sodium channel, voltage-gated, type VII, alpha                                   | 1.50E-05 | 0.26 |
| ECM2    | extracellular matrix protein 2, female organ and adipocyte specific              | 1.93E-05 | 0.26 |
| CD28    | CD28 molecule                                                                    | 2.86E-05 | 0.25 |
| DAB1    | disabled homolog 1 (Drosophila)                                                  | 5.69E-05 | 0.24 |
| CHAD    | chondroadherin                                                                   | 4.17E-05 | 0.23 |
| KCNQ5   | potassium voltage-gated channel, KQT-like subfamily, member 5                    | 2.67E-05 | 0.23 |
| NMNAT2  | nicotinamide nucleotide adenylyltransferase 2                                    | 7.24E-06 | 0.23 |



|         |                                                                       |          |      |
|---------|-----------------------------------------------------------------------|----------|------|
| AGT     | angiotensinogen (serpin peptidase inhibitor, clade A, member 8)       | 1.73E-06 | 0.23 |
| PRKCQ   | protein kinase C, theta                                               | 1.65E-05 | 0.23 |
| CALCRL  | calcitonin receptor-like                                              | 2.07E-07 | 0.22 |
| SCN3B   | sodium channel, voltage-gated, type III, beta                         | 1.10E-05 | 0.22 |
| HLF     | hepatic leukemia factor                                               | 4.45E-05 | 0.22 |
| VTN     | vitronectin                                                           | 1.66E-06 | 0.21 |
| PTPN5   | protein tyrosine phosphatase, non-receptor type 5 (striatum-enriched) | 1.15E-05 | 0.21 |
| PLXDC1  | plexin domain containing 1                                            | 3.71E-06 | 0.21 |
| GRIA1   | glutamate receptor, ionotropic, AMPA 1                                | 6.02E-05 | 0.19 |
| HPGD    | hydroxyprostaglandin dehydrogenase 15-(NAD)                           | 3.63E-06 | 0.19 |
| FMO1    | flavin containing monooxygenase 1                                     | 1.86E-05 | 0.18 |
| RSPO2   | R-spondin 2 homolog ( <i>Xenopus laevis</i> )                         | 2.98E-06 | 0.18 |
| ENPP1   | ectonucleotide pyrophosphatase/phosphodiesterase 1                    | 6.14E-06 | 0.18 |
| THSD7B  | thrombospondin, type I, domain containing 7B                          | 7.06E-05 | 0.18 |
| HSD11B2 | hydroxysteroid (11-beta) dehydrogenase 2                              | 1.99E-05 | 0.18 |
| APLNR   | apelin receptor                                                       | 4.04E-07 | 0.17 |
| HAVCR1  | hepatitis A virus cellular receptor 1                                 | 6.19E-05 | 0.17 |
| FAM124B | family with sequence similarity 124B                                  | 5.32E-06 | 0.16 |
| A2M     | alpha-2-macroglobulin                                                 | 6.64E-06 | 0.15 |
| KIT     | v-kit Hardy-Zuckerman 4 feline sarcoma viral oncogene homolog         | 1.70E-07 | 0.14 |
| NRXN1   | neurexin 1                                                            | 4.76E-05 | 0.14 |
| VSNL1   | visinin-like 1                                                        | 8.10E-05 | 0.12 |
| ADCY8   | adenylate cyclase 8 (brain)                                           | 6.96E-07 | 0.08 |
| GLP1R   | glucagon-like peptide 1 receptor                                      | 3.68E-05 | 0.07 |
| RGS8    | regulator of G-protein signaling 8                                    | 8.09E-05 | 0.06 |
